## Correction: A Challenge for the Development of Malaria Vaccines: Polymorphic Target Antigens

Colin Sutherland

In *PLoS Medicine*, volume 4, issue 3, doi:10.1371/journal.pmed.0040116:

In this Perspective, the surname of the lead author of the related research article [Takala SL, Coulibaly D, Thera MA, Dicko A, Smith DL, et al. (2007) Dynamics of polymorphism in a malaria vaccine antigen at a vaccine-testing site in Mali. *PLoS Med* 4: e93. doi:10.1371/journal.pmed.0040093] was misspelled as Takkala in all but the first use. The correct spelling is Takala.

In addition, the amino acid residues cited in the following sentence should be "1691, 1701, or 1716," rather than "1691, 1700, or 1716":

"For a given surveillance interval in which two infections occurred in the same patient, infection with a haplotype differing in amino acid sequence at residue 1691, 1700, or 1716 was significantly associated with risk of clinical malaria in the latter episode."

This correction note may be found online at doi:10.1371/journal.pmed.0040175.

Published May 29, 2007.

Citation: (2007) Correction: A challenge for the development of malaria vaccines: Polymorphic target antigens. *PLoS Med* 4(5): e175. doi:10.1371/journal.pmed.0040175

## Correction: Clonal Waves of *Neisseria* Colonisation and Disease in the African Meningitis Belt: Eight-Year Longitudinal Study in Northern Ghana

Julia Leimkugel, Abraham Hodgson, Abudulai Adams Forgor, Valentin Pflüger, Jean-Pierre Dangy, Tom Smith, Mark Achtman, Sébastien Gagneux, Gerd Pluschke

In *PLoS Medicine*, volume 4, issue 3, doi: 10.1371/journal.pmed.0040101:

The text of the Acknowledgments section was incomplete. It should have read: "We acknowledge the use of the *Neisseria* Multi Locus Sequence Typing Web site (<http://pubmlst.org/neisseria>) developed by Keith Jolley and Man-Suen Chan and sited at the University of Oxford. The development of this site has been funded by the Wellcome Trust and European Union. We are grateful for support and contributions of E. Arnold, F. Binka, S. Droz, I. Ehrhard, B. Genton, and M. Tanner. In the Navrongo Health Research Center, we greatly appreciate the assistance of A. Bugri, S. Abudulai, and A. Wahab in the laboratory; all nurses and health workers in the War Memorial Hospital, Navrongo and the Health Centers of the KND; C. Tindana with all field workers and drivers for excellent work in the field; and T. Tei and M. Bugase for logistic support. We acknowledge the use of the Navrongo Demographic Surveillance System database, and we thank all study participants for their trust and contribution."

This correction note may be found online at doi:10.1371/journal.pmed.0040196.

Published May 29, 2007.

Citation: (2007) Correction: Clonal waves of *Neisseria* colonisation and disease in the African meningitis belt: Eight-year longitudinal study in northern Ghana. *PLoS Med* 4(5): e196. doi:10.1371/journal.pmed.0040196
